# Supplementary material for: Acute high altitude exposure, acclimatization and re-exposure on nocturnal breathing
Source: Frontiers journal article supplement (doi:10.3389/fphys.2022.965021), 2022-09-05
Supplement: Data_Sheet_1.PDF [file Data_Sheet_1.PDF]

# Supplement

-

## Acute High Altitude Exposure, Acclimatization and Re-exposure on Nocturnal Breathing

Short title **Repeated altitude sojourns and nocturnal breathing**

Michael Furian<sup>1</sup>, Konstantinos Bitos<sup>1</sup>, Sara E. Hartmann<sup>2</sup>, Lara Muralt<sup>1</sup>, Mona Lichtblau<sup>1</sup>,  
Patrick R. Bader<sup>1</sup>, Jean M. Rawling<sup>3</sup>, Silvia Ulrich<sup>1</sup>, Marc J. Poulin<sup>2</sup>, Konrad E. Bloch<sup>1</sup>

<sup>1</sup> University Hospital Zurich, Department of Respiratory Medicine, Zurich, Switzerland

<sup>2</sup> University of Calgary, Cumming School of Medicine, Dept. of Physiology & Pharmacology  
and Hotchkiss Brain Institute, Calgary, Canada

<sup>3</sup> University of Calgary, Cumming School of Medicine, Dept. of Family Medicine, Calgary,  
Canada

### Correspondence

Prof. Dr. Konrad E. Bloch,

University Hospital Zurich, Department of Respiratory Medicine

Raemistreet 100, 8091 Zurich, Switzerland

Phone: +41 44 255 38 28, Fax: +41 44 255 44 51

Email: konrad.bloch@usz.ch

**Conflict of interest:** none

**Figure S1:** Effect of acute high-altitude exposure, acclimatization and re-exposure on indices of nocturnal oxygenation (panels A-C) and heart rate (panel D). In panels A-D mean  $\pm$ SD values at 520 m and at 2900 m, nights 1 and 6, in the Cycle 1 and 2 are shown. Panels A'-D' illustrate changes in variables with acute ascent in Cycle 1 and 2 (vector arrows C1 and C2) along with their mean difference (Diff.) and 95% confidence interval. Panels A''-D'' illustrate changes with acclimatization in Cycle 1 and 2 along with their mean difference and 95% confidence interval. \*P <0.05 vs. 520 m in corresponding Cycle (acute altitude effect); ‡P <0.05 vs. 1<sup>st</sup> night at 2900 m in corresponding Cycle (acclimatization effect). †P <0.05 vs. corresponding Baseline or value in Cycle 1, respectively (repeated exposure effect); \*\*P <0.05 for differences between Cycles.

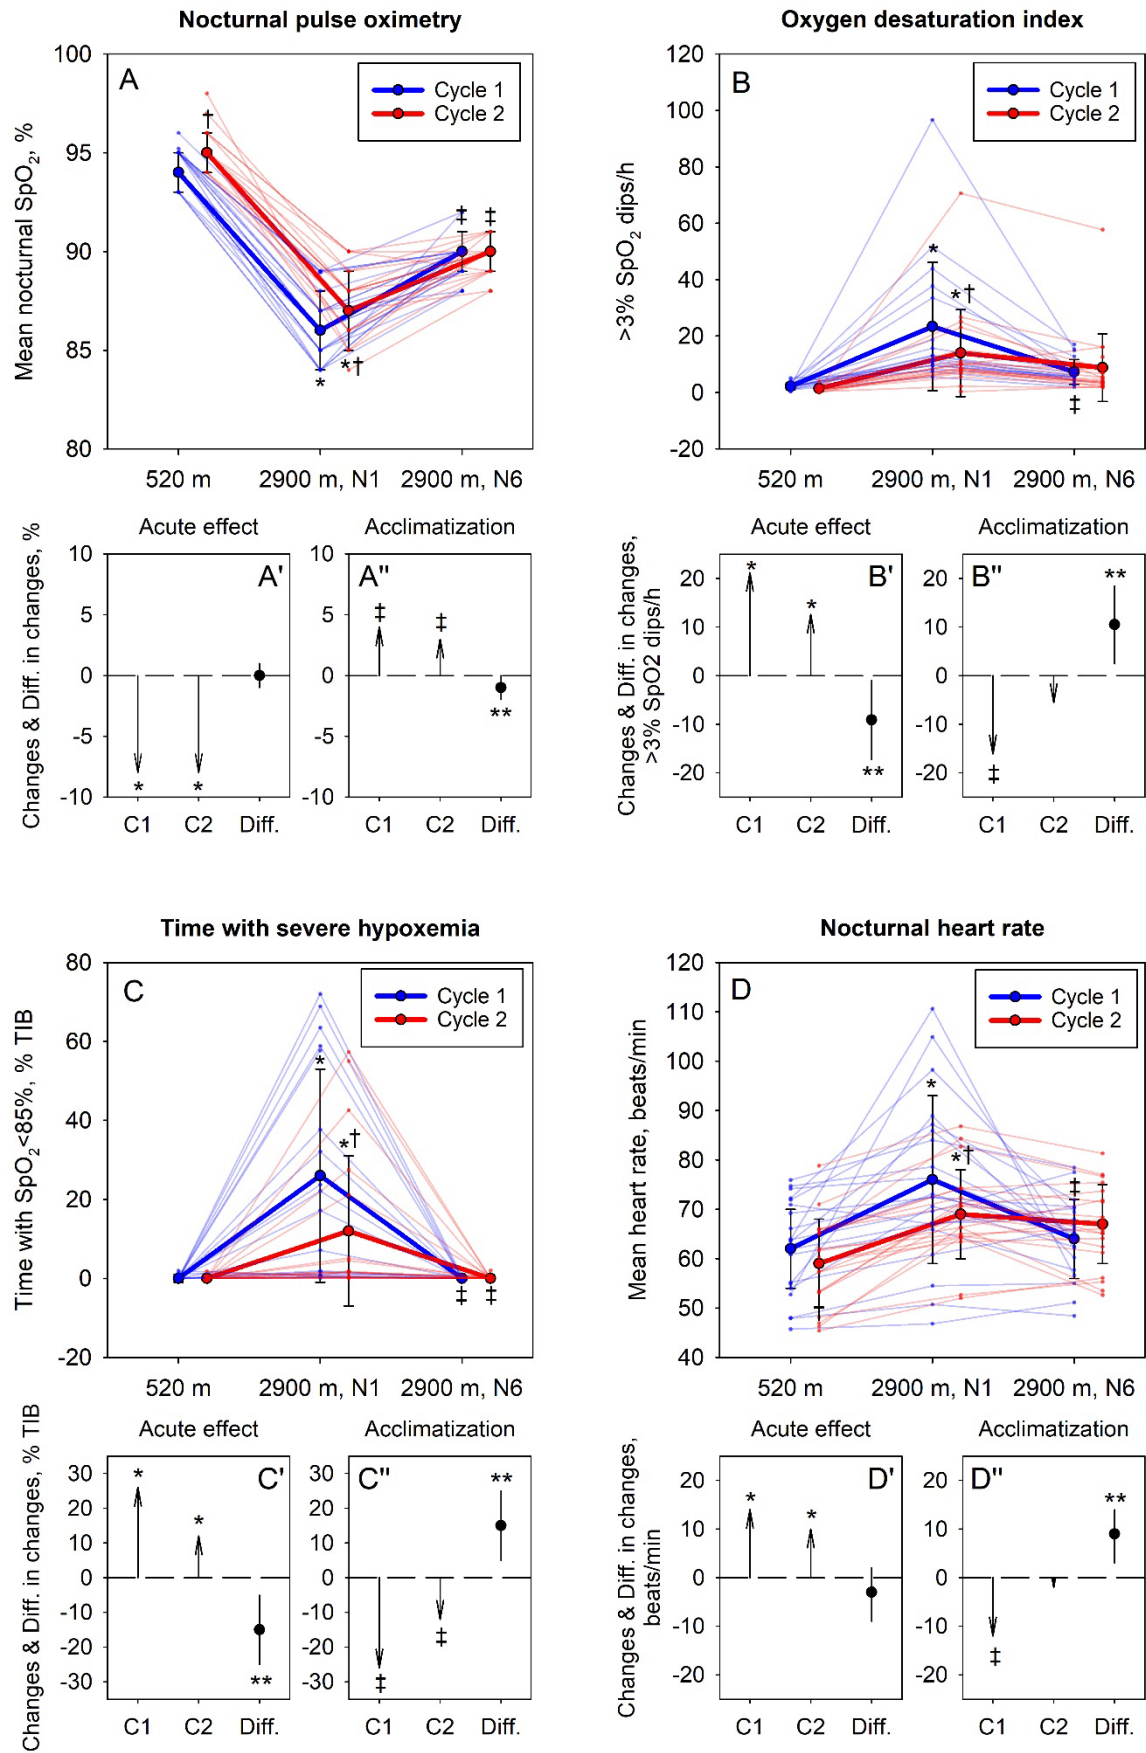

**Figure S1**
